# Supplementary material for: Nervous system development in lecithotrophic larval and juvenile stages of the annelid Capitella teleta
Source: PubMed Central journal article supplement (PMC4498530; doi:10.1186/s12983-015-0108-y), 2015-07-11

SFig 5

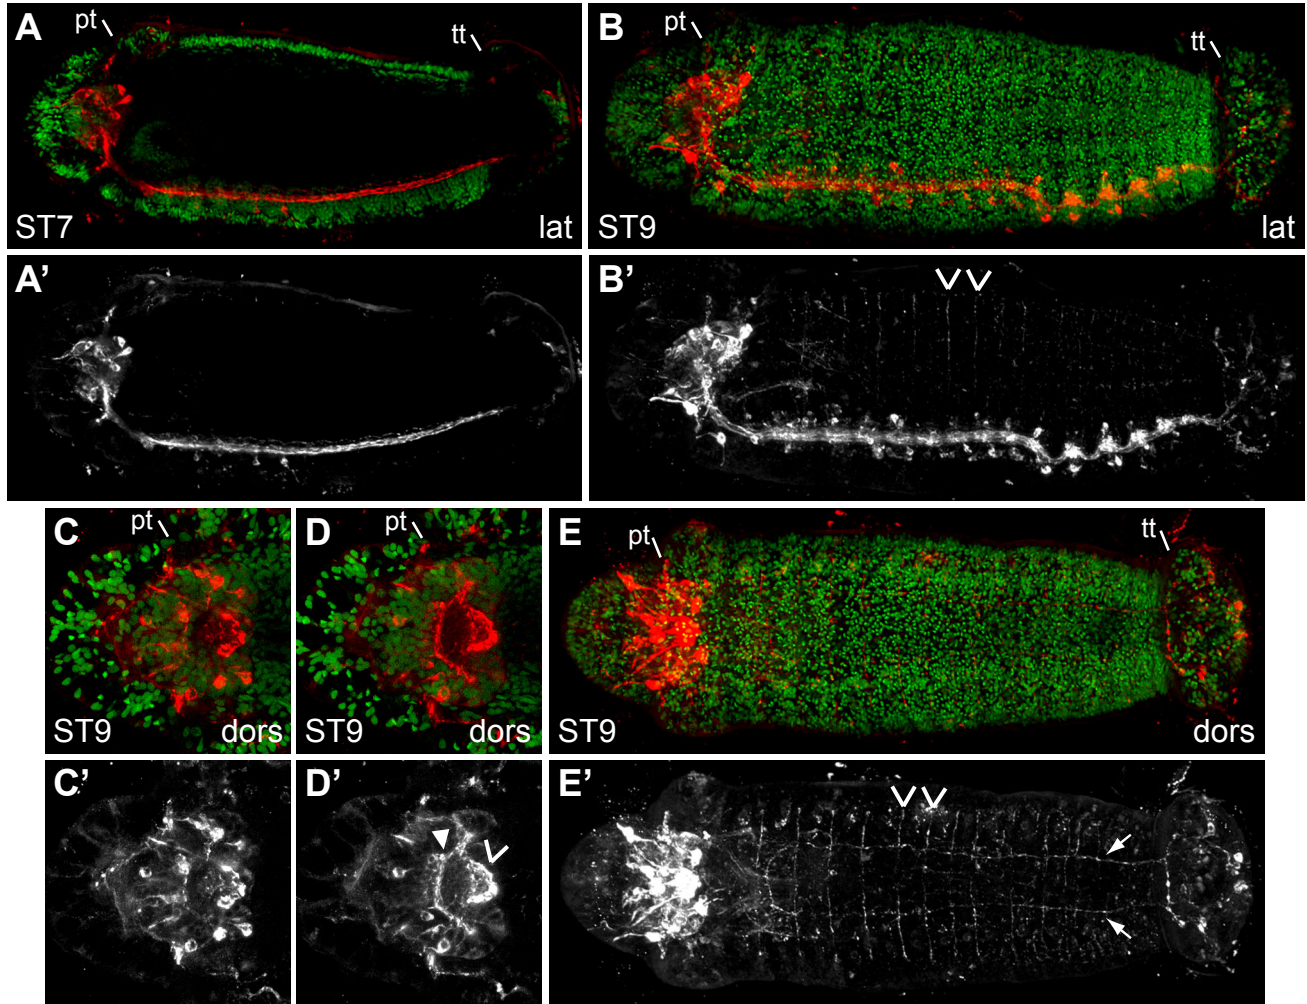

Supplement: 12983_2015_108_MOESM5_ESM.pdf [file 12983_2015_108_MOESM5_ESM.pdf]
